# Supplementary material for: Convergent High O2 Affinity but Distinct ATP-Mediated Allosteric Regulation of Hemoglobins in Oviparous and Viviparous Eremias Lizards from the Qinghai-Tibet Plateau
Source: MDPI journal article supplement (doi:10.3390/ani14101440), 2024-05-11
Supplement: s1 [file s1]

**Table S1.** PCR primers are used to amplify adult-expressed  $\alpha$ - and  $\beta$ -type globin genes of high- and low-altitude *E. argus* and *E. multiocellata*.

| Genes      | Primer names | Sequence (5' to 3')    |
|------------|--------------|------------------------|
| $\alpha$ A | lbmx-A-F     | GACGGCACCCGAGACTTTG    |
| $\alpha$ A | lbmx-A-R     | TCAAGAGCAGGTTTATTGTGGG |
| $\alpha$ D | lbmx-D-F-1   | CTGCCTGCTGCCAAGATG     |
| $\alpha$ D | lbmx-D-R-1   | GCGGAGTGCCCGAGAC       |
| $\alpha$ D | mdmx-D-F-2   | GCCACCCATCGAGCAGTT     |
| $\alpha$ D | mdmx-D-R-2   | GCGGCTCATCGGTACTTCT    |
| $\beta$ 1  | lbmx-B1-F    | CTCCAGCTCAGCCCAGAA     |
| $\beta$ 1  | lbmx-B1-R    | GAGACCAGCAGGAGGCG      |
| $\beta$ 2  | lbmx-HbB2-F  | CCCAGAAGGTTTCGTCCAG    |
| $\beta$ 2  | lbmx-HbB2-R  | TTTATTAGCTAGTGGCCCCG   |

**Table S2a.** List of  $\alpha$ -globin amino acid sequences included in the phylogenetic analyses.

| Species                              | globin     | Accession             | Source   | Family          |
|--------------------------------------|------------|-----------------------|----------|-----------------|
| Human ( <i>Homo sapiens</i> )        | $\alpha$ A | P69905                | Uniprot  | Hominidae       |
|                                      | $\alpha$ D | Q6B0K9                | Uniprot  |                 |
|                                      | $\alpha$ E | P02008                | Uniprot  |                 |
| Chicken ( <i>Gallus gallus</i> )     | $\alpha$ A | P01994                | Uniprot  | Phasianidae     |
|                                      | $\alpha$ D | P02001                | Uniprot  |                 |
|                                      | $\alpha$ E | P02007                | Uniprot  |                 |
| Anole ( <i>Anolis carolinensis</i> ) | $\alpha$ A |                       | ref1     | Dactyloidae     |
|                                      | $\alpha$ D |                       | ref1     |                 |
| <i>Gekko japonicus</i>               | $\alpha$ A | XP_015265387.1        | Genebank | Gekkonidae      |
| <i>Iguana iguana</i>                 | $\alpha$ A | P18974                | Uniprot  | Iguanidae       |
| <i>Varanus komodoensis</i>           | $\alpha$ A | KAF7241950.1          | Genebank | Varanidae       |
|                                      | $\alpha$ D | KAF7243096.1          | Genebank |                 |
| <i>Pogona vitticeps</i>              | $\alpha$ A | annotated from genome | ref2     | Agamidae        |
|                                      | $\alpha$ D | XP_020667603.1        | Genebank |                 |
| <i>Phrynocephalus erythrurus</i>     | $\alpha$ A |                       | ref3     | Agamidae        |
|                                      | $\alpha$ D |                       | ref3     |                 |
| <i>Phrynocephalus przewalskii</i>    | $\alpha$ A |                       | ref3     | Agamidae        |
|                                      | $\alpha$ D |                       | ref3     |                 |
| <i>Podarcis muralis</i>              | $\alpha$ A | XP_028561926.1        | Genebank | Lacertidae      |
|                                      | $\alpha$ D | XP_028562646.1        | Genebank |                 |
| <i>Zootoca vivipara</i>              | $\alpha$ A | XP_034986452.1        | Genebank | Lacertidae      |
|                                      | $\alpha$ D | XP_034986451.1        | Genebank |                 |
| <i>Lacerta agilis</i>                | $\alpha$ A | XP_033023270.1        | Genebank | Lacertidae      |
|                                      | $\alpha$ D | XP_033023740.1        | Genebank |                 |
| <i>Sceloporus undulatus</i>          | $\alpha$ A | XP_042294013.1        | Genebank | Phrynosomatidae |
|                                      | $\alpha$ D | XP_042294444.1        | Genebank |                 |

**Table S2b.** List of  $\beta$ -globin amino acid sequences included in the phylogenetic analyses.

| Species                           | globin    | Accession                                        | Source   | Family          |
|-----------------------------------|-----------|--------------------------------------------------|----------|-----------------|
| Human ( <i>Homo sapiens</i> )     | $\beta$   | P68871                                           | Uniprot  | Hominidae       |
| Chicken ( <i>Gallus gallus</i> )  | $\beta$   | P02112                                           | Uniprot  | Phasianidae     |
| <i>Anolis carolinensis</i>        | $\beta 1$ | XP_003229662.1                                   | Genebank | Dactyloidae     |
|                                   | $\beta 2$ | named as $\beta^I$ in ref1                       | ref1     |                 |
| <i>Gekko japonicus</i>            | $\beta 2$ | XP_015266989.1                                   | Genebank | Gekkonidae      |
| <i>Iguana iguana</i>              | $\beta 1$ | P18987                                           | Uniprot  | Iguanidae       |
|                                   | $\beta 2$ | P86390                                           | Uniprot  |                 |
| <i>Amblyrhynchus cristatus</i>    | $\beta 2$ | P86391                                           | Uniprot  | Iguanidae       |
| <i>Varanus komodoensis</i>        | $\beta$   | KAF7236611.1                                     | Genebank | Varanidae       |
| <i>Varanus albigularis</i>        | $\beta 1$ | P18993                                           | Uniprot  | Varanidae       |
| <i>Pogona vitticeps</i>           | $\beta 1$ | XP_020647556.1                                   | Genebank | Agamidae        |
| <i>Phrynocephalus erythrurus</i>  | $\beta 1$ |                                                  | ref3     | Agamidae        |
|                                   | $\beta 2$ |                                                  | ref3     |                 |
| <i>Phrynocephalus przewalskii</i> | $\beta 1$ |                                                  | ref3     | Agamidae        |
|                                   | $\beta 2$ |                                                  | ref3     |                 |
| <i>Podarcis muralis</i>           | $\beta 1$ | XP_028581395.1                                   | Genebank | Lacertidae      |
|                                   | $\beta 2$ | XP_028581397.1                                   | Genebank |                 |
| <i>Zootoca vivipara</i>           | $\beta 1$ | XP_034972328.1                                   | Genebank | Lacertidae      |
|                                   | e         | XP_034970899.1                                   | Genebank |                 |
| <i>Lacerta agilis</i>             | $\beta 1$ | XP_033001617.1<br>(annotated as $\beta 2$ -like) | Genebank | Lacertidae      |
|                                   | $\beta 2$ | XP_033001613.1<br>(annotated as $\beta 1$ -like) | Genebank |                 |
| <i>Sceloporus undulatus</i>       | $\beta 1$ | XP_042316261.1                                   | Genebank | Phrynosomatidae |
|                                   | $\beta 2$ | XP_042316446.1                                   | Genebank |                 |

The name of  $\beta 1$  and  $\beta 2$  in anole were inaccurate in the study of Storz JF et al. (2011). We aligned the  $\beta^{II}$  in their study to the nr database with the blastp of NCBI and found that  $\beta^{II}$  was completely consistent with the  $\beta 1$  annotated in the anole genome (ref4). The re-annotation of the anole genome by Lu S (2017) (ref3) also confirmed that  $\beta^I$  and  $\beta^{II}$  in the study of Storz JF et al. (2011) should be  $\beta 2$  and  $\beta 1$ . In addition, the  $\beta 1$  and  $\beta 2$  of *L. agilis* also have the same naming problem as anole. Blastp results found that its  $\beta 1$  is most similar to  $\beta 2$  of *P. muralis*, while its  $\beta 2$  is most similar to  $\beta 1$  of *Z. vivipara* and *P. muralis*. Therefore, in this study, we renamed the  $\beta 1$  and  $\beta 2$  of the anole and *L. agilis* based on the blastp results.

ref1: Storz JF et al. (2011). Developmental regulation of hemoglobin synthesis in the green anole lizard *Anolis carolinensis*. *The Journal of Experimental Biology* **214**, 575-81.

ref2: Georges A et al. (2015). High-coverage sequencing and annotated assembly of the genome of the Australian dragon lizard *Pogona vitticeps*. *Gigascience* **4**, s13742-015-0085-2.

ref3: Lu S (2017). The adaptive mechanism of globin family to high altitude hypoxia in *Phrynocephalus* lizards (Doctor's thesis in Chinese).

**Table S3.** The theoretical molecular weight (MW) of  $\alpha$ - and  $\beta$ -type globins sequenced in high- and low-altitude *E. argus* and *E. multiocellata*

| MW                         | $\alpha$ A | $\alpha$ D1 | $\alpha$ D2 | $\beta$ 1-1 | $\beta$ 1-2 | $\beta$ 2 |
|----------------------------|------------|-------------|-------------|-------------|-------------|-----------|
| <i>E. argus</i> -H         | 14903.14   | 15990.36    | -           | 16182.82    | 16198.82    | 16026.47  |
| <i>E. argus</i> L          | 14903.14   | 15972.32    | -           | 16182.82    | 16198.82    | 16045.53  |
| <i>E. multiocellata</i> -H | 14903.14   | 15999.37    | 16109.52    | 16254.97    | -           | 16026.47  |
| <i>E. multiocellata</i> -L | 14903.14   | 15999.37    | 16109.52    | 16285.98    | -           | 15948.4   |

**Table S4.** O<sub>2</sub> affinities (indexed as P<sub>50</sub> values) and Hill's cooperativity coefficients (indexed as n<sub>50</sub> values) for high- and low-altitude *E. argus* and Hbs measured in pH 7.8, 7.4 Hepes buffers at 25 °C and 37 °C in the absence (stripped) and presence of Cl<sup>-</sup> (added as 0.1 mol/L KCl) and/or ATP (100-fold molar excess over tetrameric Hbs).

| Means ± SEM            | <i>E. argus</i> -High  |                         |                         |                         | <i>E. argus</i> -Low   |                         |                         |                         |
|------------------------|------------------------|-------------------------|-------------------------|-------------------------|------------------------|-------------------------|-------------------------|-------------------------|
| Temperature            | 25 °C                  |                         | 37 °C                   |                         | 25 °C                  |                         | 37 °C                   |                         |
| pH                     | 7.8                    | 7.4                     | 7.8                     | 7.4                     | 7.8                    | 7.4                     | 7.8                     | 7.4                     |
| P <sub>50</sub> (mmHg) |                        |                         |                         |                         |                        |                         |                         |                         |
| Stripped               | 2.21±0.03 <sup>a</sup> | 2.77±0.03 <sup>a</sup>  | 4.02±0.03 <sup>a</sup>  | 4.54±0.10 <sup>a</sup>  | 3.22±0.02 <sup>a</sup> | 3.87±0.01 <sup>a</sup>  | 5.04±0.08 <sup>a</sup>  | 5.44±0.08 <sup>a</sup>  |
| +KCl                   | 3.49±0.02 <sup>b</sup> | 4.06±0.05 <sup>b</sup>  | 4.83±0.05 <sup>b</sup>  | 5.71±0.08 <sup>b</sup>  | 4.38±0.02 <sup>b</sup> | 5.01±0.08 <sup>b</sup>  | 5.64±0.03 <sup>b</sup>  | 6.57±0.13 <sup>b</sup>  |
| +ATP                   | 7.54±0.05 <sup>c</sup> | 11.50±0.07 <sup>c</sup> | 11.00±0.07 <sup>c</sup> | 14.48±0.10 <sup>c</sup> | 8.51±0.06 <sup>c</sup> | 12.51±0.05 <sup>c</sup> | 11.95±0.06 <sup>c</sup> | 15.70±0.07 <sup>c</sup> |
| +KCl +ATP              | 7.36±0.06 <sup>d</sup> | 11.16±0.11 <sup>c</sup> | 11.23±0.03 <sup>c</sup> | 14.84±0.11 <sup>d</sup> | 8.31±0.06 <sup>c</sup> | 12.10±0.08 <sup>d</sup> | 12.14±0.03 <sup>c</sup> | 16.06±0.05 <sup>d</sup> |
| n <sub>50</sub>        |                        |                         |                         |                         |                        |                         |                         |                         |
| Stripped               | 2.54±0.05              | 2.39±.11                | 1.89±0.05               | 2.01±0.05               | 2.48±0.04              | 2.46±0.08               | 2.07±0.05               | 2.05±0.03               |
| +KCl                   | 3.08±0.11              | 2.89±0.06               | 2.29±0.06               | 2.38±0.02               | 2.48±0.07              | 2.78±0.06               | 2.13±0.02               | 2.07±0.03               |
| +ATP                   | 2.46±0.03              | 2.65±0.03               | 2.52±0.04               | 2.52±0.06               | 2.37±0.05              | 2.59±0.04               | 2.36±0.03               | 2.34±0.04               |
| +KCl +ATP              | 2.68±0.06              | 2.69±0.04               | 2.53±0.04               | 2.49±0.02               | 2.42±0.08              | 2.41±0.03               | 2.45±0.03               | 2.39±0.03               |

Different letters of right superscript on P<sub>50</sub> values in each population Hbs indicate the significant differences between the stripped state and conditions for adding KCl and/or ATP under the same temperature and pH condition according to the one-way ANOVA using the LSD (equal variances) and Games-Howell (unequal variance) method of post hoc multiple comparisons.

**Table S5.** O<sub>2</sub> affinities (indexed as P<sub>50</sub> values) and Hill's cooperativity coefficients (indexed as n<sub>50</sub> values) for high- and low-altitude *E. multiocellata* Hbs measured in pH 7.8, 7.4 Hepes buffers at 25 °C and 37 °C in the absence (stripped) and presence of Cl<sup>-</sup> (added as 0.1 mol/L KCl) and/or ATP (100-fold molar excess over tetrameric Hbs).

| Means ± SEM            | <i>E. multiocellata</i> -High |                        |                        |                         | <i>E. multiocellata</i> -Low |                        |                         |                         |
|------------------------|-------------------------------|------------------------|------------------------|-------------------------|------------------------------|------------------------|-------------------------|-------------------------|
| Temperature            | 25 °C                         |                        | 37 °C                  |                         | 25 °C                        |                        | 37 °C                   |                         |
| pH                     | 7.8                           | 7.4                    | 7.8                    | 7.4                     | 7.8                          | 7.4                    | 7.8                     | 7.4                     |
| P <sub>50</sub> (mmHg) |                               |                        |                        |                         |                              |                        |                         |                         |
| Stripped               | 2.62±0.02 <sup>a</sup>        | 3.25±0.03 <sup>a</sup> | 4.17±0.03 <sup>a</sup> | 4.89±0.05 <sup>a</sup>  | 3.26±0.02 <sup>a</sup>       | 4.05±0.03 <sup>a</sup> | 4.69±0.02 <sup>a</sup>  | 5.46±0.04 <sup>a</sup>  |
| +KCl                   | 3.28±0.03 <sup>b</sup>        | 3.99±0.05 <sup>b</sup> | 4.77±0.03 <sup>b</sup> | 5.38±0.03 <sup>b</sup>  | 4.20±0.02 <sup>b</sup>       | 4.98±0.03 <sup>b</sup> | 5.71±0.02 <sup>b</sup>  | 6.35±0.04 <sup>b</sup>  |
| +ATP                   | 5.34±0.01 <sup>c</sup>        | 7.14±0.02 <sup>c</sup> | 7.96±0.06 <sup>c</sup> | 10.43±0.08 <sup>c</sup> | 6.47±0.05 <sup>c</sup>       | 8.34±0.05 <sup>c</sup> | 9.65±0.01 <sup>c</sup>  | 11.52±0.06 <sup>c</sup> |
| +KCl +ATP              | 6.38±0.04 <sup>d</sup>        | 8.16±0.02 <sup>d</sup> | 8.99±0.06 <sup>d</sup> | 10.59±0.11 <sup>c</sup> | 7.46±0.04 <sup>d</sup>       | 9.48±0.05 <sup>d</sup> | 10.68±0.04 <sup>d</sup> | 12.67±0.10 <sup>d</sup> |
| n <sub>50</sub>        |                               |                        |                        |                         |                              |                        |                         |                         |
| Stripped               | 2.19±0.07                     | 2.42±0.07              | 2.18±0.02              | 2.26±0.09               | 2.40±0.06                    | 2.55±0.11              | 2.12±0.01               | 2.13±0.05               |
| +KCl                   | 2.47±0.07                     | 2.55±0.06              | 2.42±0.06              | 2.44±0.06               | 2.82±0.08                    | 2.98±0.07              | 2.30±0.04               | 2.30±0.04               |
| +ATP                   | 2.58±0.04                     | 2.93±0.07              | 2.41±0.05              | 2.63±0.07               | 2.39±0.06                    | 3.01±0.04              | 2.41±0.04               | 2.52±0.03               |
| +KCl +ATP              | 2.85±0.12                     | 2.82±0.04              | 2.68±0.05              | 2.85±0.05               | 2.25±0.03                    | 2.58±0.03              | 2.44±0.04               | 2.45±0.06               |

Different letters of right superscript on P<sub>50</sub> values in each population Hbs indicate the significant differences between the stripped state and conditions for adding KCl and/or ATP under the same temperature and pH condition according to one-way ANOVA using the LSD (equal variances) and Games-Howell (unequal variance) method of post hoc multiple comparisons ( $P < 0.05$ ).

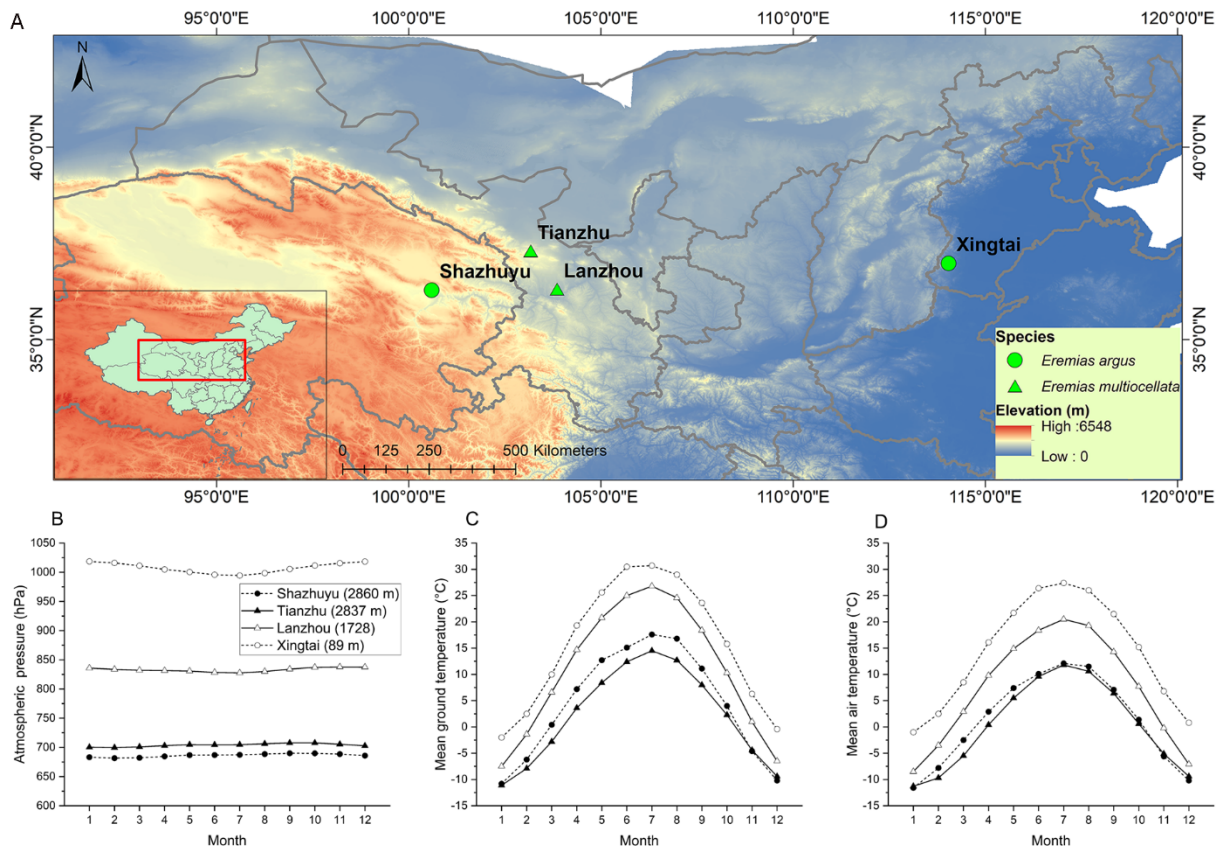

**Figure S1** The geographical location (A) and climate data (B, C, D) from 1981 to 2010 of four sample sites of *Eremias argus* (Shazhuyu and Xingtai) and *Eremias multiocellata* (Tianzhu and Lanzhou). B, atmospheric pressure; C, mean ground temperature; D, mean air temperature.



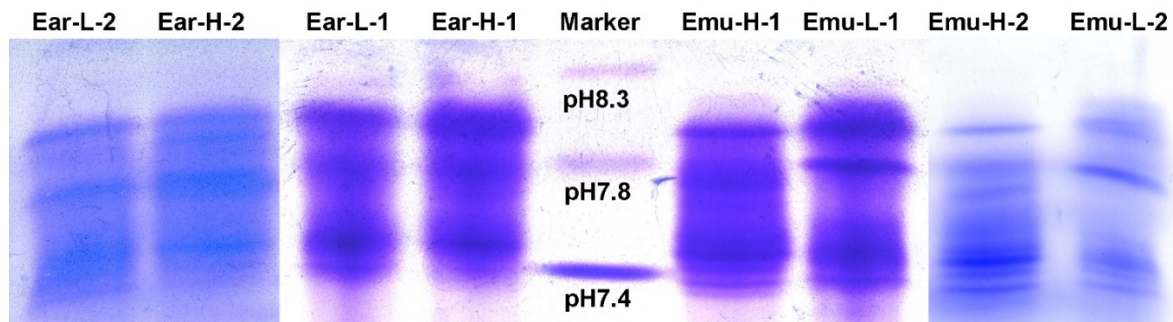

**Figure S2** Isoelectric focusing (pH 3–10) of the pooled purified isoform Hb mixture from high-altitude (Ear-H) and low-altitude (Ear-L) *E. argus*, and high-altitude (Emu-H) and low-altitude (Emu-L) *E. multiocellata*. Samples in lanes Ear-H-2, Ear-L-2, Emu-H-2 and Emu-L-2 are dilutions of samples in lanes Ear-H-1, Ear-L-1, Emu-H-1 and Emu-L-1, respectively.

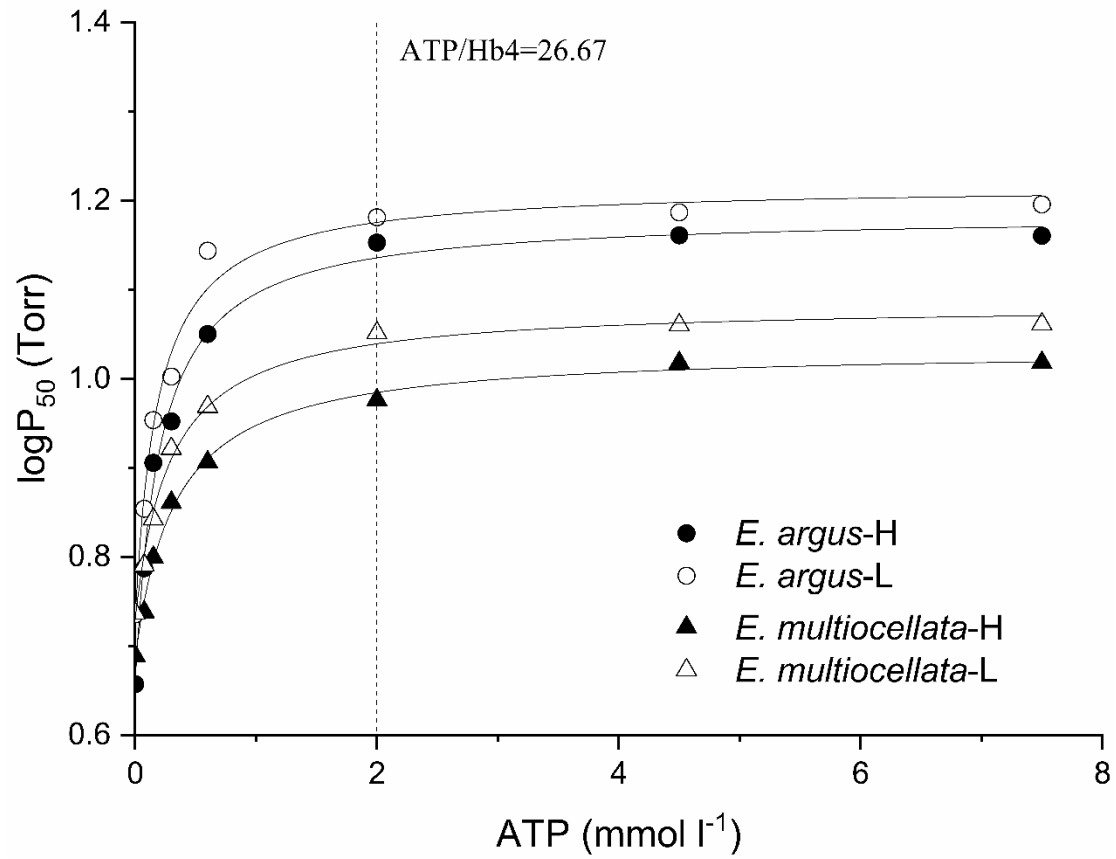

**Figure S3.** Dose-response curves showing effects of ATP on  $P_{50}$  of high- (solid) and low- (open) altitude *E. argus* (circle) and *E. multiocellata* (triangle) Hbs measured at 37 °C pH7.4 in the absence of Cl<sup>-</sup>.  $n = 6$  lizards for each population and 6 technical repeats were performed for each experiment condition.

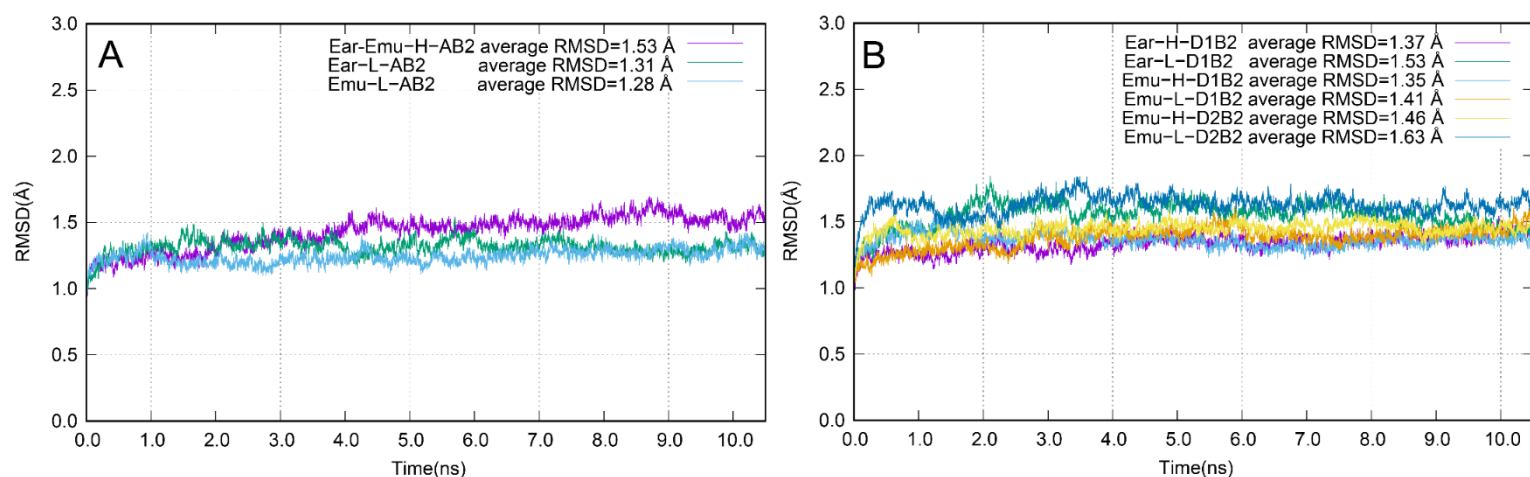

**Figure S4** Evolution of root mean square deviation (RMSD) of the atoms in the backbone of the Hbs over time in AB2 Hb models (A) molecular dynamics simulations and DB2 Hb models (B) molecular dynamics simulations. The average RMSD over the last 4 ns for AB2 and DB2 models were also shown in A and B. Ear-H and Ear-L indicate the high- and low-altitude *E. argus*, Emu-H, and Emu-L indicate the high- and low-altitude *E. multiocellata*. AB2, D1B2 and D2B2 indicate the Hb models formed by  $\alpha$ A,  $\alpha$ D1,  $\alpha$ D2 and  $\beta$ 2 globin, respectively. Ear-Emu-H-AB2 indicates the same AB2 ( $\alpha$ A $\beta$ 2) Hb model of high-altitude *E. argus* and *E. multiocellata* as their  $\alpha$ A and  $\beta$ 2 globins are the same.
